# Supplementary material for: Interactions of β-Conglycinin (7S) with Different Phenolic Acids—Impact on Structural Characteristics and Proteolytic Degradation of Proteins
Source: MDPI journal article supplement (doi:10.3390/ijms17101671), 2016-10-02
Supplement: s1 [file s1]

# Supplementary Materials: Interactions of $\beta$ -Conglycinin (7S) with Different Phenolic Acids—Impact on Structural Characteristics and Proteolytic Degradation of Proteins

Jing Gan, Hao Chen, Jiyuan Liu, Yongquan Wang, Satoru Nirasawa and Yongqiang Cheng

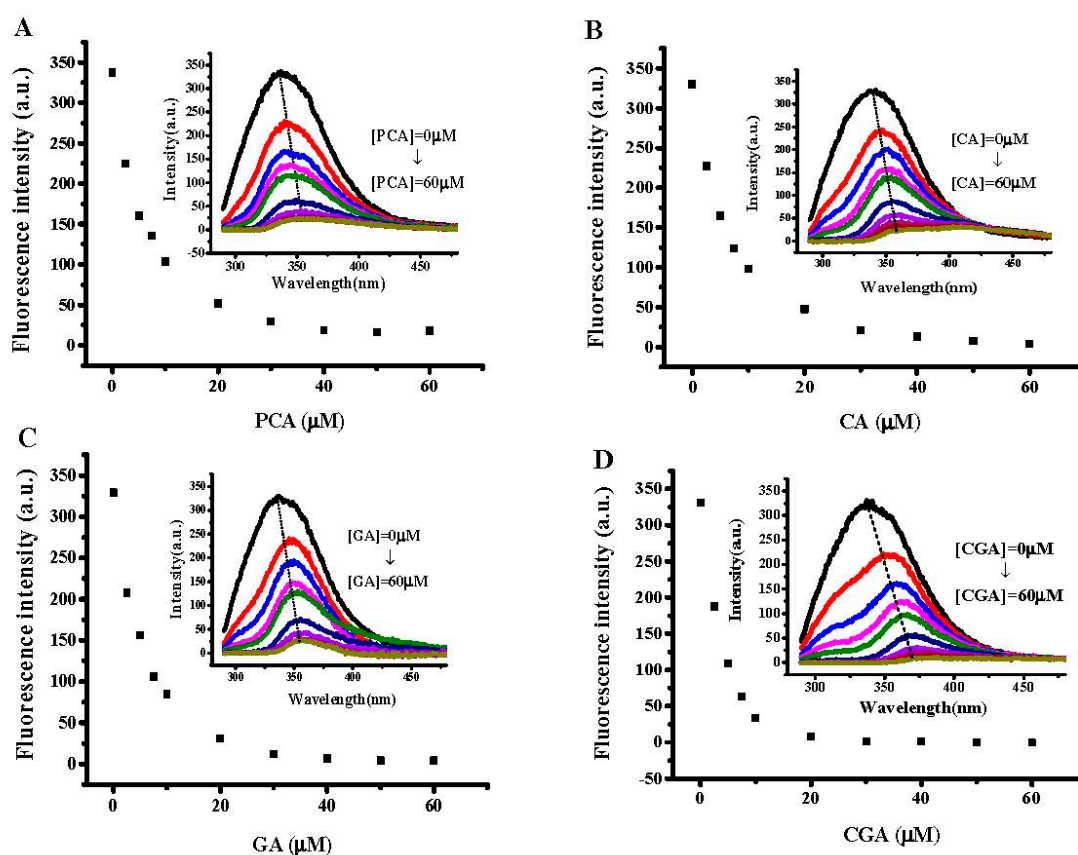

**Figure S1.** Fluorescence spectra of soy protein 7S and soy protein 7S treated with (A) PCA; (B) CA; (C) GA; and (D) CGA at different concentrations, respectively. Conditions: 1  $\mu$ M 7S in 10 mM MOPS, 5 mM NaCl, [phenolic acids] = 60  $\mu$ M, pH 4.0, 25  $^{\circ}$ C.  $\lambda_{\text{Ex}}$  = 280 nm, slits for excitation and emission are 5 nm and 10 nm.

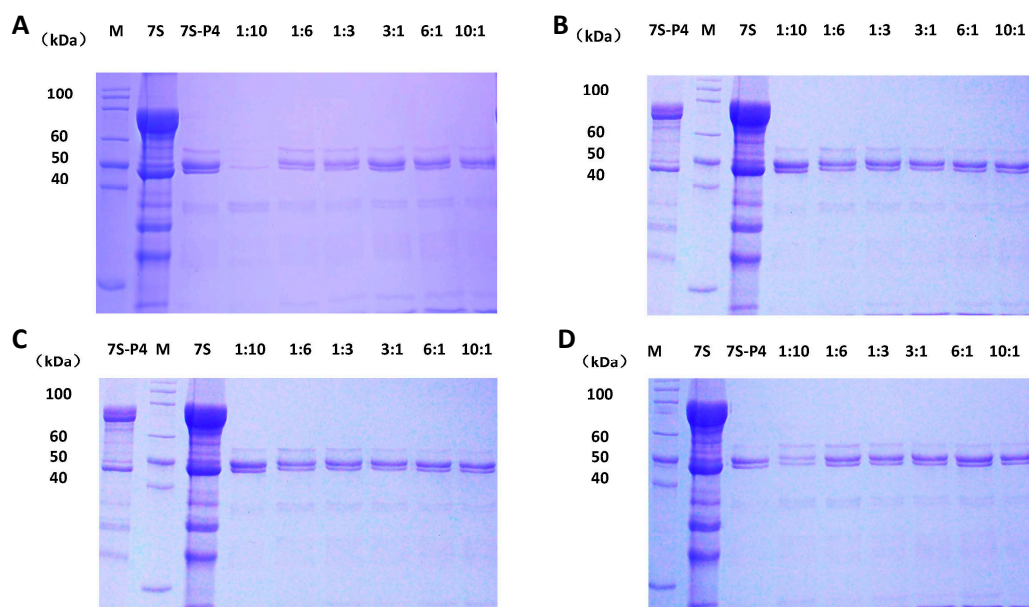

**Figure S2.** SDS-PAGE analyses of the digestive stability of soy protein 7S in the absence and presence of PCA (A); CA (B); GA (C); and CGA (D) at different concentrations in simulated gastric fluid (pH 4.0). Conditions: [soy protein 7S] = 3  $\mu$ M, the ratio of protein to phenolic acid is over the range of 1:10, 1:6, 1:3, 3:1, 6:1, and 10:1. "7S-P4" represents a mixture of pepsin and soy protein 7S in the absence of phenolic acids.
